# Supplementary material for: Unusual isosymmetric order–disorder phase transition in a new perovskite-type dimethylhydrazinium manganese formate exhibiting weak ferromagnetism and photoluminescence properties
Source: Royal Society of Chemistry journal article supplement (doi:10.1039/d1tc01014j), 2021-01-01
Supplement: d1tc01014j1.pdf [file d1tc01014j1.pdf]

Supporting Information for

**Unusual isosymmetric order-disorder phase transition in the new perovskite-type dimethylhydrazinium manganese formate exhibiting weak ferromagnetism and photoluminescent properties**

by J.A. Zienkiewicz, D. Kowalska, K. Fedoruk, M. Stefański, A. Pikul, M. Ptak

**Content:**

Fig. S1. The asymmetric unit of the LT and HT phase

Fig. S2. Powder X-ray diffraction pattern of [DMHy]Mn(HCOO)<sub>3</sub>

Fig. S3. The DSC traces

Fig. S4. The temperature dependence of the dielectric loss  $\varepsilon''$

Fig. S5. Relaxation times as a function of  $1000/T$

Fig. S6. The result of determining the energy band gap ( $E_g$ ) using the Kubelka-Munk theory

Fig. S7. Activation energy of the thermal quenching of emission bands of [DMHy]Mn(HCOO)<sub>3</sub> crystals excited at 266 nm

Fig. S8. The luminescence decay profile of [DMHy]Mn(HCOO)<sub>3</sub> crystals excited at 266 nm and monitored at 725 nm recorded at 77 K

Tab. S1. Hydrogen bond geometry

Tab. S2. Selected geometric parameters

Tab. S3. The temperature-dependent isosymmetric PTs reported for single and double 3D hybrid perovskites

**Fig. S1.** The asymmetric unit at 300 K (HT phase) (a) and at 100 K (LT phase) (b) showing the atom numbering scheme. Displacement ellipsoids are drawn at the 50 % probability level. In the HT phase the DMHy<sup>+</sup> cation is disordered over three positions with the same ratio  $\frac{1}{3}$  (the positions disordered over C and N atoms are presented as octants). [Symmetry codes: <sup>i</sup>  $-x, -y+1, -z+2$ ; <sup>ii</sup>  $-x+1, -y+2, -z+2$ .]

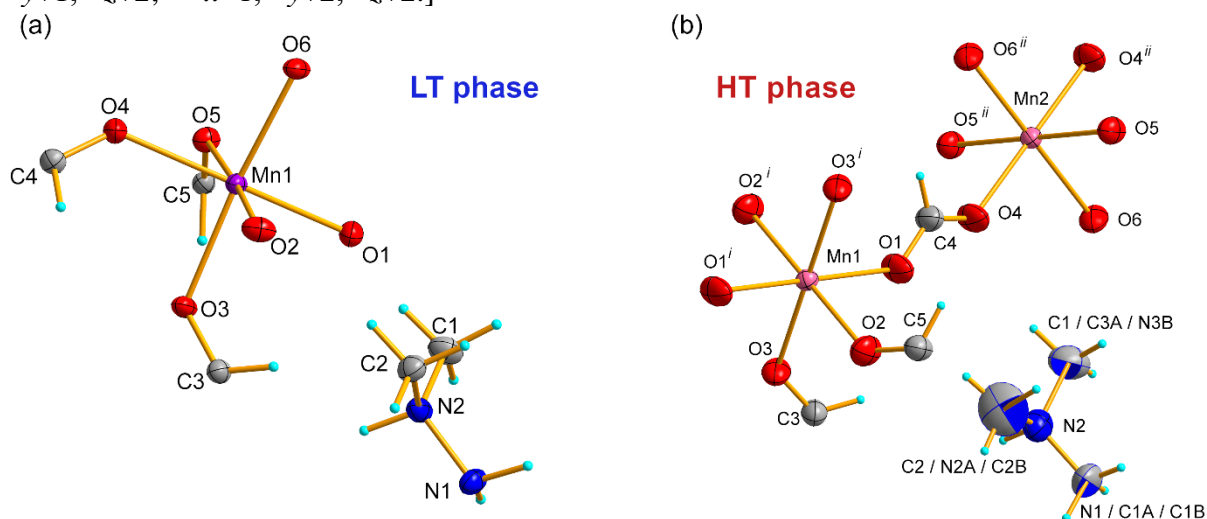

**Fig. S2.** Powder XRD pattern for the as-prepared bulk sample of [DMHy]Mn(HCOO)<sub>3</sub> together with the simulated one based on the single crystal structure refined at 300 K

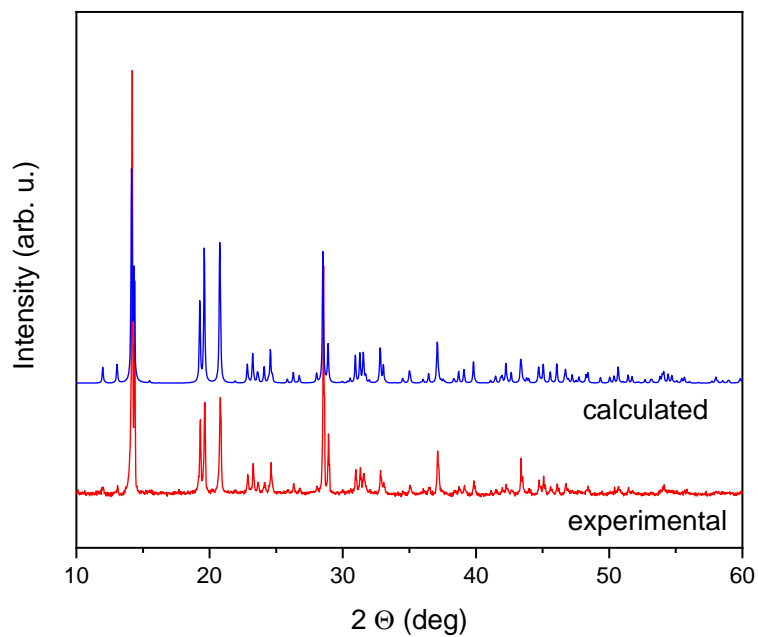

**Fig. S3.** The DSC traces measured in a cooling and heating runs

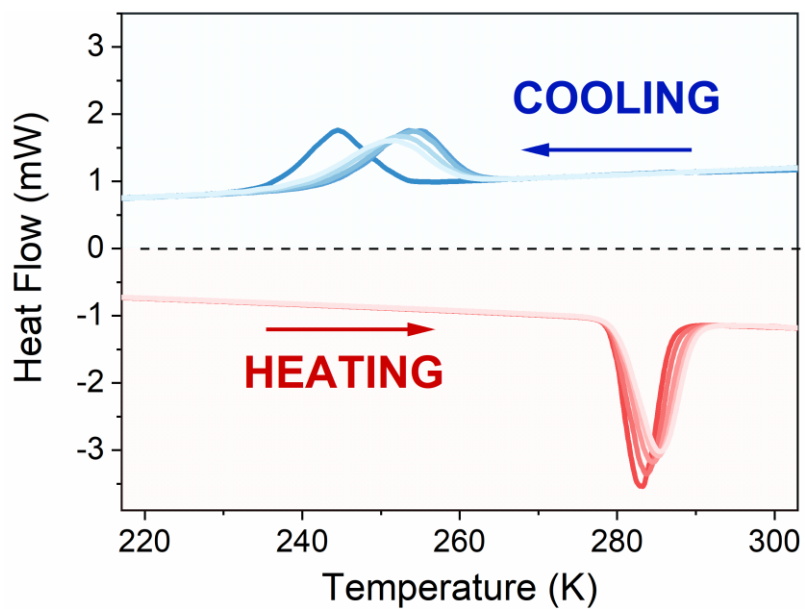

**Fig. S4.** The temperature dependence of the dielectric loss  $\varepsilon''$  of [DMHy]Mn(HCOO)<sub>3</sub> measured for (a) single crystal in the [110] directions, (b) single crystal in the perpendicular to [110] direction, (c) a pellet. The representative curves are plotted in frequency decades between 10<sup>3</sup> Hz and 10<sup>6</sup> Hz. The vertical lines correspond to the phase-transition temperatures obtained from the dynamic DSC measurements

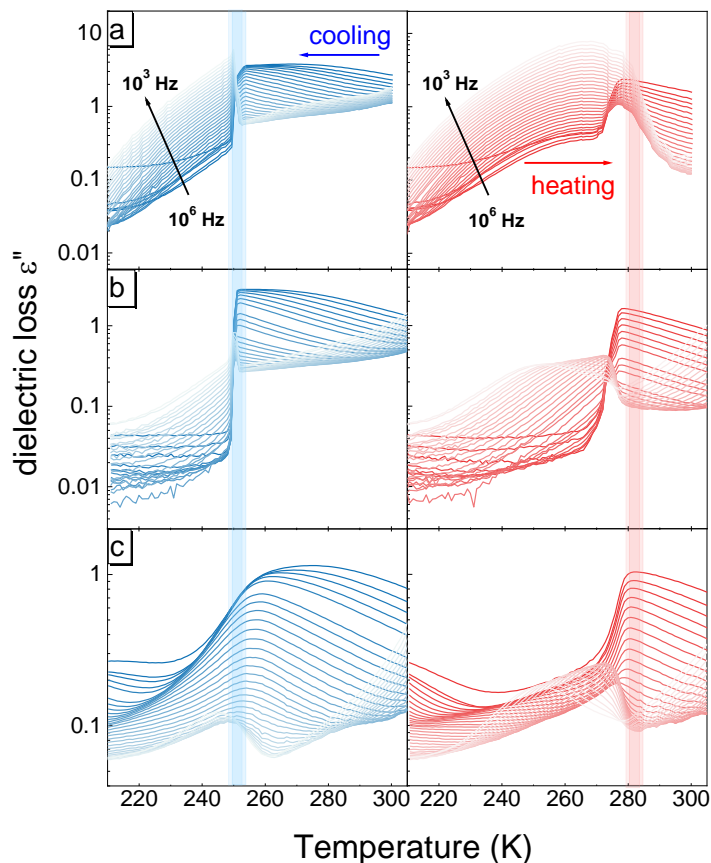

**Fig. S5.** Relaxation times as a function of  $1000/T$ . The blue points correspond to the curves obtained during cooling, and the red points during heating. The inset shows the frequency-dependent dielectric loss measured at 250 K (on cooling) and 275 K (on heating).

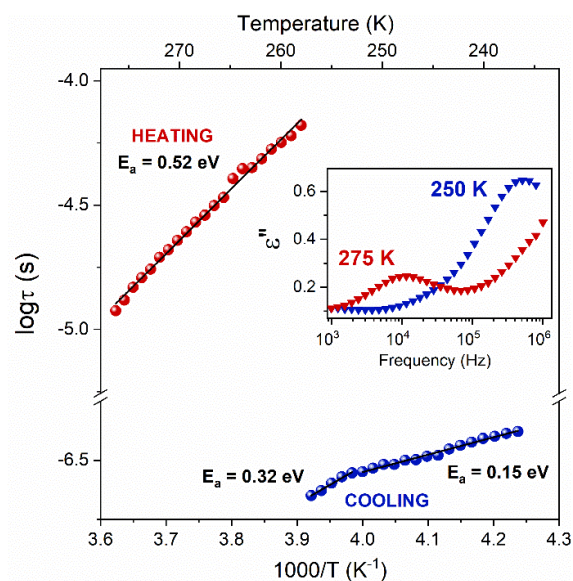

**Fig. S6.** The result of determining the energy band gap ( $E_g$ ) using the Kubelka-Munk theory for the  $[\text{DMHy}]\text{Mn}(\text{HCOO})_3$  crystals

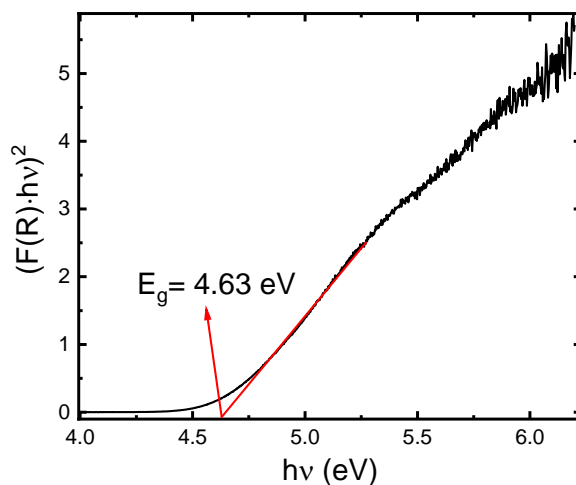

**Fig. S7.** Activation energy of the thermal quenching of emission bands of  $[\text{DMHy}]\text{Mn}(\text{HCOO})_3$  crystals excited at 266 nm

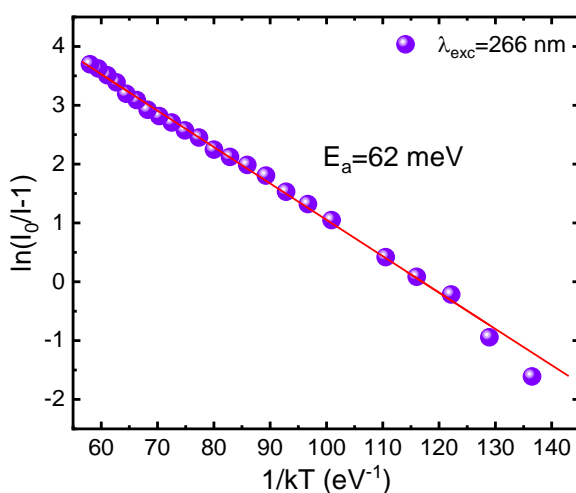

**Fig. S8.** The luminescence decay profile of  $[\text{DMHy}]\text{Mn}(\text{HCOO})_3$  crystals excited at 266 nm and monitored at 725 nm recorded at 77 K

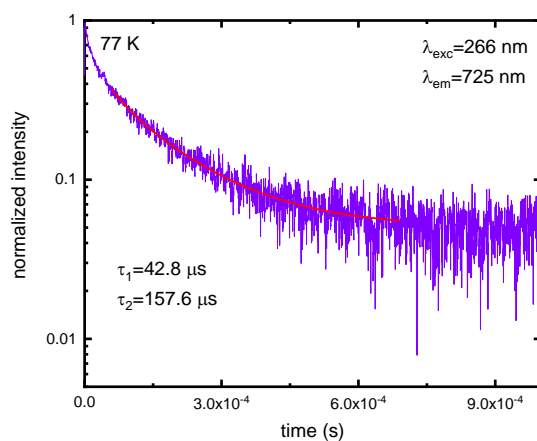

**Tab. S1.** Hydrogen-bond geometry for [DMHy]Mn(HCOO)<sub>3</sub>

| $D-H\cdots A$                      | $D-H$ (Å) | $H\cdots A$ (Å) | $D\cdots A$ (Å) | $D-H\cdots A$ (°) |
|------------------------------------|-----------|-----------------|-----------------|-------------------|
| <b>HT phase (300 K)</b>            |           |                 |                 |                   |
| N1—H1A $\cdots$ O2 <sup>i</sup>    | 1.03      | 2.58            | 3.537 (10)      | 154               |
| N1—H1B $\cdots$ O6 <sup>ii</sup>   | 1.03      | 2.16            | 3.040 (6)       | 143               |
| N2—H2 $\cdots$ O5 <sup>iii</sup>   | 0.98      | 1.84            | 2.811 (3)       | 173               |
| C1—H1D $\cdots$ O3 <sup>iv</sup>   | 0.96      | 2.57            | 3.432 (10)      | 149               |
| C1—H1E $\cdots$ O4                 | 0.96      | 2.37            | 3.265 (10)      | 154               |
| N1A—H1AB $\cdots$ O1 <sup>v</sup>  | 1.03      | 2.55            | 3.412 (8)       | 140               |
| N1A—H1AB $\cdots$ O2 <sup>vi</sup> | 1.03      | 2.44            | 3.207 (6)       | 131               |
| C1A—H1AC $\cdots$ O3 <sup>iv</sup> | 0.96      | 2.45            | 3.359 (7)       | 157               |
| C1A—H1AD $\cdots$ O4               | 0.96      | 2.51            | 3.428 (8)       | 161               |
| C2A—H2AC $\cdots$ O1               | 0.96      | 2.38            | 3.305 (12)      | 163               |
| <b>LT phase (100 K)</b>            |           |                 |                 |                   |
| N1—H1A $\cdots$ O6 <sup>ii</sup>   | 1.00      | 1.99            | 2.961 (3)       | 163               |
| N1—H1B $\cdots$ O1 <sup>vii</sup>  | 0.99      | 2.09            | 3.072 (3)       | 177               |
| N1—H1B $\cdots$ O4 <sup>v</sup>    | 0.99      | 2.53            | 3.172 (4)       | 123               |
| N2—H2 $\cdots$ O4 <sup>v</sup>     | 0.98      | 2.60            | 3.133 (3)       | 115               |
| N2—H2 $\cdots$ O5 <sup>v</sup>     | 0.98      | 1.94            | 2.846 (3)       | 152               |
| C2—H2A $\cdots$ O2 <sup>viii</sup> | 0.96      | 2.52            | 3.267 (4)       | 135               |
| C2—H2B $\cdots$ O5 <sup>ix</sup>   | 0.96      | 2.37            | 3.321 (4)       | 169               |
| C2—H2C $\cdots$ O3 <sup>iv</sup>   | 0.96      | 2.55            | 3.456 (4)       | 157               |

Symmetry codes: <sup>i</sup>  $-x+1/2, y+1/2, -z+3/2$ ; <sup>ii</sup>  $-x+3/2, y-1/2, -z+3/2$ ; <sup>iii</sup>  $x-1/2, -y+3/2, z-1/2$ ; <sup>iv</sup>  $x+1, y, z$ ; <sup>v</sup>  $-x+1/2, y-1/2, -z+3/2$ ; <sup>vi</sup>  $x+1/2, -y+1/2, z-1/2$ ; <sup>vii</sup>  $-x+1, -y+1, -z+1$ ; <sup>viii</sup>  $-x+1, -y+1, -z+2$ ; <sup>ix</sup>  $x+1/2, -y+3/2, z+1/2$ .

All e.s.d.'s (except the e.s.d. in the dihedral angle between two l.s. planes) are estimated using the full covariance matrix. The cell e.s.d.'s are taken into account individually in the estimation of e.s.d.'s in distances, angles and torsion angles; correlations between e.s.d.'s in cell parameters are only used when they are defined by crystal symmetry. An approximate (isotropic) treatment of cell e.s.d.'s is used for estimating e.s.d.'s involving l.s. planes.

**Tab. S2.** Selected geometric parameters (Å, °) in [DMHy]Mn(HCOO)<sub>3</sub>

| <b>HT phase (300 K)</b> |             |                      |           |
|-------------------------|-------------|----------------------|-----------|
| Mn1—O1                  | 2.1773 (16) | O1—C4                | 1.225 (3) |
| Mn1—O1 <sup>i</sup>     | 2.1773 (16) | O2—C5                | 1.224 (3) |
| Mn1—O2                  | 2.1864 (16) | O3—C3                | 1.233 (3) |
| Mn1—O2 <sup>i</sup>     | 2.1864 (16) | O4—C4                | 1.229 (3) |
| Mn1—O3                  | 2.1875 (17) | O5—C5 <sup>iii</sup> | 1.256 (3) |
| Mn1—O3 <sup>i</sup>     | 2.1875 (17) | O6—C3 <sup>iv</sup>  | 1.229 (3) |

|                      |             |        |            |
|----------------------|-------------|--------|------------|
| Mn2—O4               | 2.1681 (16) | N1—N2  | 1.482 (6)  |
| Mn2—O4 <sup>ii</sup> | 2.1681 (16) | N2—C1  | 1.398 (10) |
| Mn2—O5               | 2.2046 (15) | N2—C2  | 1.476 (10) |
| Mn2—O5 <sup>ii</sup> | 2.2046 (15) | N2—N1A | 1.428 (6)  |
| Mn2—O6               | 2.1873 (16) | N2—C1A | 1.538 (8)  |
| Mn2—O6 <sup>ii</sup> | 2.1873 (16) | N2—C2A | 1.538 (8)  |

### LT phase (100 K)

|        |           |                      |           |
|--------|-----------|----------------------|-----------|
| Mn1—O4 | 2.173 (2) | O3—C3                | 1.251 (3) |
| Mn1—O5 | 2.199 (2) | O6—C3 <sup>iv</sup>  | 1.256 (3) |
| Mn1—O3 | 2.190 (2) | N1—N2                | 1.447 (3) |
| Mn1—O6 | 2.180 (2) | O2—C5 <sup>vi</sup>  | 1.252 (4) |
| Mn1—O2 | 2.188 (2) | O1—C4 <sup>vii</sup> | 1.248 (4) |
| Mn1—O1 | 2.181 (2) | N2—C2                | 1.488 (4) |
| O4—C4  | 1.246 (4) | N2—C1                | 1.490 (4) |
| O5—C5  | 1.267 (4) |                      |           |

### HT phase (300 K)

|                                        |           |                           |             |
|----------------------------------------|-----------|---------------------------|-------------|
| O1—Mn1—O1 <sup>i</sup>                 | 180.0     | O6—Mn2—O5                 | 87.93 (6)   |
| O1 <sup>i</sup> —Mn1—O2 <sup>i</sup>   | 89.44 (7) | O6—Mn2—O5 <sup>ii</sup>   | 92.07 (6)   |
| O1 <sup>i</sup> —Mn1—O2                | 90.56 (7) | O6 <sup>ii</sup> —Mn2—O6  | 180.0       |
| O1—Mn1—O2 <sup>i</sup>                 | 90.56 (7) | C4—O1—Mn1                 | 133.92 (15) |
| O1—Mn1—O2                              | 89.44 (7) | C5—O2—Mn1                 | 136.81 (15) |
| O1 <sup>i</sup> —Mn1—O3                | 90.64 (7) | C3—O3—Mn1                 | 127.76 (16) |
| O1 <sup>i</sup> —Mn1—O3 <sup>i</sup>   | 89.36 (7) | C4—O4—Mn2                 | 134.89 (16) |
| O1—Mn1—O3 <sup>i</sup>                 | 90.64 (7) | C5 <sup>iii</sup> —O5—Mn2 | 126.38 (14) |
| O1—Mn1—O3                              | 89.36 (7) | C3 <sup>iv</sup> —O6—Mn2  | 132.23 (16) |
| O2 <sup>i</sup> —Mn1—O2                | 180.0     | O6 <sup>v</sup> —C3—O3    | 128.4 (2)   |
| O2 <sup>i</sup> —Mn1—O3                | 93.37 (6) | O1—C4—O4                  | 127.6 (2)   |
| O2—Mn1—O3 <sup>i</sup>                 | 93.37 (6) | O2—C5—O5 <sup>iii</sup>   | 125.5 (2)   |
| O2 <sup>i</sup> —Mn1—O3 <sup>i</sup>   | 86.63 (6) | N1—N2—C1A                 | 102.7 (4)   |
| O2—Mn1—O3                              | 86.63 (6) | C1—N2—N1                  | 113.7 (5)   |
| O3—Mn1—O3 <sup>i</sup>                 | 180.0     | C1—N2—C2                  | 109.2 (6)   |
| O4—Mn2—O4 <sup>ii</sup>                | 180.0     | C1—N2—N1A                 | 120.6 (5)   |
| O4—Mn2—O5 <sup>ii</sup>                | 85.91 (7) | C1—N2—C1A                 | 12.5 (5)    |
| O4 <sup>ii</sup> —Mn2—O5               | 85.91 (7) | C1—N2—C2A                 | 98.0 (6)    |
| O4—Mn2—O5                              | 94.09 (7) | C2—N2—N1                  | 113.4 (5)   |
| O4 <sup>ii</sup> —Mn2—O5 <sup>ii</sup> | 94.09 (7) | C2—N2—C1A                 | 120.6 (5)   |
| O4—Mn2—O6 <sup>ii</sup>                | 91.06 (6) | C2—N2—C2A                 | 15.3 (6)    |
| O4 <sup>ii</sup> —Mn2—O6               | 91.06 (6) | N1A—N2—N1                 | 19.2 (3)    |
| O4—Mn2—O6                              | 88.94 (6) | N1A—N2—C2                 | 94.5 (5)    |

|                                        |            |            |           |
|----------------------------------------|------------|------------|-----------|
| O4 <sup>ii</sup> —Mn2—O6 <sup>ii</sup> | 88.94 (6)  | N1A—N2—C1A | 112.1 (4) |
| O5—Mn2—O5 <sup>ii</sup>                | 180.00 (9) | N1A—N2—C2A | 109.5 (5) |
| O6 <sup>ii</sup> —Mn2—O5 <sup>ii</sup> | 87.93 (6)  | C2A—N2—N1  | 128.5 (5) |
| O6 <sup>ii</sup> —Mn2—O5               | 92.07 (6)  | C2A—N2—C1A | 110.2 (5) |

### LT phase (100 K)

|             |            |                           |             |
|-------------|------------|---------------------------|-------------|
| O4—Mn1—O5   | 81.16 (8)  | O1—Mn1—O2                 | 94.70 (10)  |
| O4—Mn1—O3   | 92.50 (8)  | C4—O4—Mn1                 | 130.7 (2)   |
| O4—Mn1—O6   | 90.94 (8)  | C5—O5—Mn1                 | 126.5 (2)   |
| O4—Mn1—O2   | 96.20 (9)  | C3—O3—Mn1                 | 121.37 (16) |
| O4—Mn1—O1   | 168.79 (9) | C3 <sup>iv</sup> —O6—Mn1  | 129.81 (17) |
| O3—Mn1—O5   | 92.58 (8)  | C5 <sup>vi</sup> —O2—Mn1  | 132.2 (2)   |
| O6—Mn1—O5   | 94.38 (8)  | O2 <sup>viii</sup> —C5—O5 | 125.0 (3)   |
| O6—Mn1—O3   | 172.64 (7) | C4 <sup>ix</sup> —O1—Mn1  | 134.1 (2)   |
| O6—Mn1—O2   | 87.41 (8)  | O4—C4—O1 <sup>x</sup>     | 124.4 (3)   |
| O6—Mn1—O1   | 92.14 (8)  | N1—N2—C2                  | 109.0 (2)   |
| O2—Mn1—O5   | 176.82 (8) | N1—N2—C1                  | 114.2 (2)   |
| O2—Mn1—O3   | 85.75 (8)  | C2—N2—C1                  | 111.2 (2)   |
| O1—Mn1—O5   | 87.86 (9)  | O3—C3—O6 <sup>v</sup>     | 125.1 (2)   |
| O1—Mn1—O3   | 85.72 (8)  |                           |             |
| Br3—Pb1—Br1 | 92.973 (8) |                           |             |

Symmetry codes: <sup>i</sup>  $-x, -y+1, -z+2$ ; <sup>ii</sup>  $-x+1, -y+2, -z+2$ ; <sup>iii</sup>  $-x+1, -y+1, -z+2$ ; <sup>iv</sup>  $-x+1/2, y+1/2, -z+3/2$ ; <sup>v</sup>  $-x+1/2, y-1/2, -z+3/2$ ; <sup>vi</sup>  $x+1/2, -y+3/2, z+1/2$ ; <sup>vii</sup>  $x+1/2, -y+3/2, z-1/2$ ; <sup>viii</sup>  $x-1/2, -y+3/2, z-1/2$ ; <sup>ix</sup>  $x-1, y, z$ ; <sup>x</sup>  $x-1/2, -y+3/2, z+1/2$ .

**Tab. S3.** The temperature-dependent isosymmetric PTs reported for single and double 3D hybrid perovskites

| Compound                                          | LT → HT                           | T (K) <sup>a</sup> | Order           | TF        | Ref.         |
|---------------------------------------------------|-----------------------------------|--------------------|-----------------|-----------|--------------|
| <b>Perovskites</b>                                |                                   |                    |                 |           |              |
| [DMHy]Mn(HCOO) <sub>3</sub>                       | $P2_1/n \rightarrow P2_1/n$       | 250.9 / 281.9      | 1 <sup>st</sup> | 1.01      | <sup>b</sup> |
| [Im]Mg(HCOO) <sub>3</sub>                         | $P2_1/n \rightarrow P2_1/n$       | 451 / 448          | 2 <sup>nd</sup> | 0.90      | 1,2          |
| [MA]Mn(N <sub>3</sub> ) <sub>3</sub> <sup>c</sup> | $P2_1/c \rightarrow P2_1/c$       | 280 / 263          | 1 <sup>st</sup> | 0.84      | 3,4          |
| [GA]SnCl <sub>3</sub>                             | $Pnma \rightarrow Pnma$           | 419 / 409          | 1 <sup>st</sup> | 1.18<br>5 | 5,6          |
| <b>Double perovskite</b>                          |                                   |                    |                 |           |              |
| [DMA] <sub>2</sub> KCo(CN) <sub>6</sub>           | $P4/mnc \rightarrow P4/mnc$       | 249 / 241          | 1 <sup>st</sup> | 0.96      | 7            |
| [DMA] <sub>2</sub> KCr(CN) <sub>6</sub>           | $P4/mnc \rightarrow P4/mnc$       | 218 / 215          | 1 <sup>st</sup> | 0.95      | 8            |
| [DMA] <sub>2</sub> KFe(CN) <sub>6</sub>           | $P4/mnc \rightarrow P4/mnc$       | 228 / 227          | 1 <sup>st</sup> | 0.96      | 9,10         |
| [Im] <sub>2</sub> KCo(CN) <sub>6</sub>            | $R\bar{3}m \rightarrow R\bar{3}m$ | 198                | <sup>d</sup>    | 0.93      | 11           |
| [Im] <sub>2</sub> KFe(CN) <sub>6</sub>            | $R\bar{3}m \rightarrow R\bar{3}m$ | 187                | 2 <sup>nd</sup> | 0.93      | 12           |
| [Tz] <sub>2</sub> KCo(CN) <sub>6</sub>            | $Cmcm \rightarrow Cmcm$           | 237                | 1 <sup>st</sup> | 1.07      | 13           |

Key: <sup>a</sup> on heating/cooling, if given; <sup>b</sup> this work; <sup>c</sup> both (LT and HT) phases are ordered; <sup>d</sup> not given; <sup>e</sup> not calculated; Im<sup>+</sup>, imidazolium; MA<sup>+</sup>, methylammonium; GA<sup>+</sup>, guanidinium, DMA<sup>+</sup>, dimethylammonium; Tz<sup>+</sup>, thiazolium

- Chem. Phys.*, 2016, **18**, 13993–14000.
- 2 G. Kieslich, S. Sun and A. K. Cheetham, *Chem. Sci.*, 2014, **5**, 4712–4715.
- 3 X. H. Zhao, X. C. Huang, S. L. Zhang, D. Shao, H. Y. Wei and X. Y. Wang, *J. Am. Chem. Soc.*, 2013, **135**, 16006–16009.
- 4 G. Kieslich, S. Sun and A. K. Cheetham, *Chem. Sci.*, 2015, **6**, 3430–3433.
- 5 M. Szafranski and K. Stähl, *J. Solid State Chem.*, 2007, **180**, 2209–2215.
- 6 T. Oku, *Rev. Adv. Mater. Sci.*, 2020, **59**, 264–305.
- 7 W. Zhang, H.-Y. Ye, R. Graf, H. W. Spiess, Y.-F. Yao, R.-Q. Zhu and R.-G. Xiong, *J. Am. Chem. Soc.*, 2013, **135**, 5230–5233.
- 8 M. Rok, G. Bator, B. Zarychta, B. Dziuk, J. Repeć, W. Medycki, M. Zamponi, G. Usevičius, M. Šimenas and J. Banys, *Dalt. Trans.*, 2019, **48**, 4190–4202.
- 9 M. Rok, G. Bator, W. Medycki, M. Zamponi, S. Balčiūnas, M. Šimėnas and J. Banys, *Dalt. Trans.*, 2018, **47**, 17329–17341.
- 10 W.-J. Xu, S.-L. Chen, Z.-T. Hu, R.-B. Lin, Y.-J. Su, W.-X. Zhang and X.-M. Chen, *Dalt. Trans.*, 2016, **45**, 4224–4229.
- 11 X. Zhang, X. D. Shao, S. C. Li, Y. Cai, Y. F. Yao, R. G. Xiong and W. Zhang, *Chem. Commun.*, 2015, **51**, 4568–4571.
- 12 W. Zhang, Y. Cai, R.-G. Xiong, H. Yoshikawa and K. Awaga, *Angew. Chemie Int. Ed.*, 2010, **49**, 6608–6610.
- 13 Z. X. Gong, Q. W. Wang, J. J. Ma, J. Y. Jiang, D. Y. E, Z. Q. Li, F. W. Qi and H. Liang, *Mater. Chem. Front.*, 2020, **4**, 918–923.
